# Supplementary material
Source: publisher figshare collection journal article supplement (https://frontiersin.figshare.com/ndownloader/files/31636838)
Supplement: Supplementary file [file 31636838]

(A)

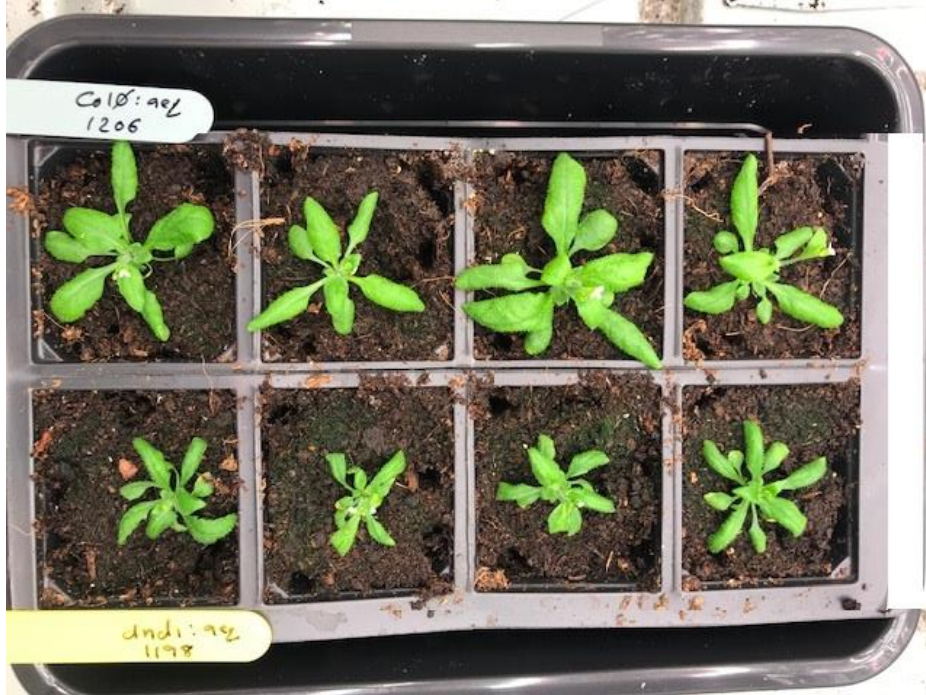

(B)

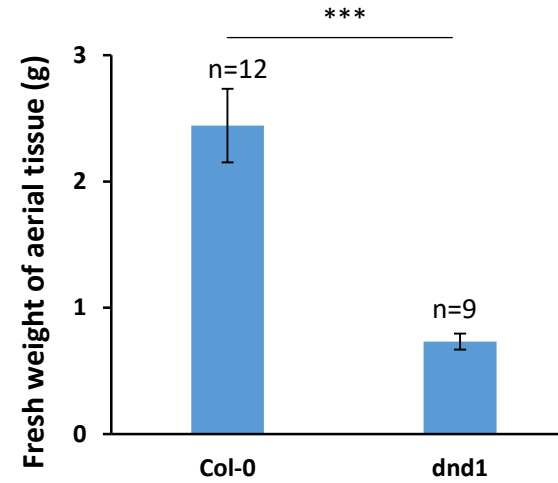

Figure S1. Dwarf phenotype of *dnd1*. A. Col-0 (top row) and *dnd1* (bottom row) grown in soil. B. Mean  $\pm$  SEM fresh weight of aerial tissue. *n* denotes number of plants. Student's *t*-test was used for analysing statistical difference (\*\*\*,  $p < 0.001$ ). Plants were grown on Levington's F2 compost for 44 days under long-day conditions (16 h light / 8 h dark) at  $200 \mu\text{mol m}^{-2} \text{s}^{-1}$  light intensity,  $20^\circ\text{C}$ , 60 % relative humidity.
